# Supplementary material
Source: publisher figshare collection journal article supplement (https://gsapubs.figshare.com/articles/dataset/_/16540329)
Supplement: Supplementary file 1 [file 1]

Wei Zhang, Feng-Qi Zhang, Yildirim Dilek, Kong-Yang Zhu, Hong-Xiang Wu, Dong-Xu Chen, and Han-Lin Chen, 2021, Basin response to the Jurassic geodynamic turnover from flat subduction to normal subduction in South China: GSA Bulletin, <https://doi.org/10.1130/B36059.1>.

## Supplemental Material

**TABLE S1.** RESULTS OF POINT-COUNTED MODAL COMPOSITION OF MEDIUM-GRADED SANDSTONE OF EARLY–MIDDLE JURASSIC SUCCESSION IN NORTHWESTERN ZHEJIANG.

**TABLE S2.** RESULTS OF LA-ICP-MS DETRITITAL ZIRCON U-Pb AGE ANALYSIS OF EARLY–MIDDLE JURASSIC SUCCESSION IN NORTHWESTERN ZHEJIANG.

**TABLE S3.** RESULTS OF SELECTED TRACE ELEMENT ANALYSES (CONTENTS IN PPM) OF JURASSIC-AGED ZIRCONS BY LA-ICP-MS FROM EARLY–MIDDLE JURASSIC SUCCESSION IN NORTHWESTERN ZHEJIANG.

**DATASET S1.** SUMMARY OF ZIRCON U-Pb AGE OF IGNEOUS ROCKS FROM THE YANGTZE BLOCK.

**DATASET S2.** SUMMARY OF ZIRCON U-Pb AGE OF IGNEOUS ROCKS FROM THE CATHAYSIA BLOCK.
